# Supplementary material for: A novel fluorescent assay for uracil DNA glycosylase activity built on the 3′–5′ exonuclease activity-based endonuclease IV cyclic signal amplification strategy
Source: Royal Society of Chemistry journal article supplement (doi:10.1039/d0nj04729e), 2020-01-01
Supplement: d0nj04729e1.pdf [file d0nj04729e1.pdf]

Electronic Supplementary Material (ESI) for Analyst  
This journal is © The Royal Society of Chemistry 2013

## Supporting Information

### **A novel fluorescent assay of Uracil DNA glycosylase activity by 3'-5' exonuclease activity-based endonuclease IV cyclic signal amplification strategy**

**Jing-Xuan Tian<sup>1</sup>, Yan-Zhao Fang<sup>1</sup>, Yi-Xuan Yang<sup>1</sup>, Shuang Wu<sup>\*2</sup>, Qiang Xiao<sup>\*1</sup>  
and Xiang-Juan Kong<sup>\*1</sup>**

*1 Jiangxi Key Laboratory of Organic Chemistry, Jiangxi Science and Technology  
Normal University, Nanchang 330013, P. R. China\**

*2 A Key Laboratory of Jiangxi Province for Persistent Pollutants Control and  
Resources Recycle, Nanchang Hangkong University, Nanchang 330063, P. R. China.*

Email: shuang\_wu@nchu.edu.cn; xiaoqiang@tsinghua.org.cn;

xiangjuankong@163.com

## Materials and Experimental details

All the oligonucleotides used in this work (Table 1) were synthesized and HPLC-purified by Sangon Biotech. Co. Ltd. (Shanghai, China).

**Table S1. Oligonucleotides Used in This Work**

| Oligonucleotide | Sequence (5'-3')                                                  |
|-----------------|-------------------------------------------------------------------|
| MB              | Dabcyl-CGCTGTCCAGTCAGTGTCTCAGCG-FAM                               |
| P1              | CTA GAG ATT T dU CCA GCT GAG GAA ATG GAA AAT<br>CTC TAG AAA AAA A |
| P2              | CCA GCT GAG GAA ATG GAA AAT CTC TAG AAA AAA<br>A                  |
| P3              | AGAGATTTTCCCACTGACTTTTTTTT                                        |
| P4              | TAACCACGAGTCAGTGTCTCAGCG-FAM                                      |
| P5              | TTA ACC ACA AGT CAG TGT CCT CA-FAM                                |
| P6              | TTA ACC ACA AGT CAG TGT CCT-FAM                                   |
| P7              | TTAACCACAAGTCAGTGTCTCAGC-FAM                                      |

*E. coli* uracil DNA glycosylase (UDG), *E. coli* endonuclease IV (Endo IV), *E. coli* exonuclease III (Exo III), uracil glycosylase inhibitor (UGI), *E. coli* DNase I, apurinic/aprimidinic Endonuclease 1 (APE1) and agarose were purchased from New England Biolabs (Ipswich, MA, USA). Bovine serum albumin (BSA), alkaline phosphatase (ALP) and nuclear and cytoplasmic protein extraction kit were purchased from Sangon Biotech. Co. Ltd. (Shanghai, China). The O'Range Ruler 10 bp DNA Ladder (10-150 bp) was purchased from Thermo Fisher Scientific Co. Ltd (MA, USA). Graphene oxide was purchased from XFNANO Company (Nanjing, China). Goldview and ethidium bromide were purchased from Beijing Dingguo Changsheng Biotechnology Co. Ltd. (China). All the other chemical reagents were of analytical grade, which were used without further purification. The water used throughout the experiments was obtained from a water purification system with an electric resistance of >18.2 M $\Omega$ ·cm (Sartorius, Germany).

Fluorescence measurements were performed in a 96-well black microplate on a Varioskan LUX microplate reader with 405nm excitation light (Thermo Scientific,

USA). Fourier Translation Infrared (FT-IR) spectroscopy was measured using a Spectrum Two spectrometer (PerkinElmer, USA). Transmission electron microscope (TEM) image was acquired by TECNAI G<sup>2</sup> 20 with an accelerating voltage of 200 kV (FEI, USA). Atomic Force Microscope (AFM) image was acquired by CSPM5500 (Bibby Scientific, China).

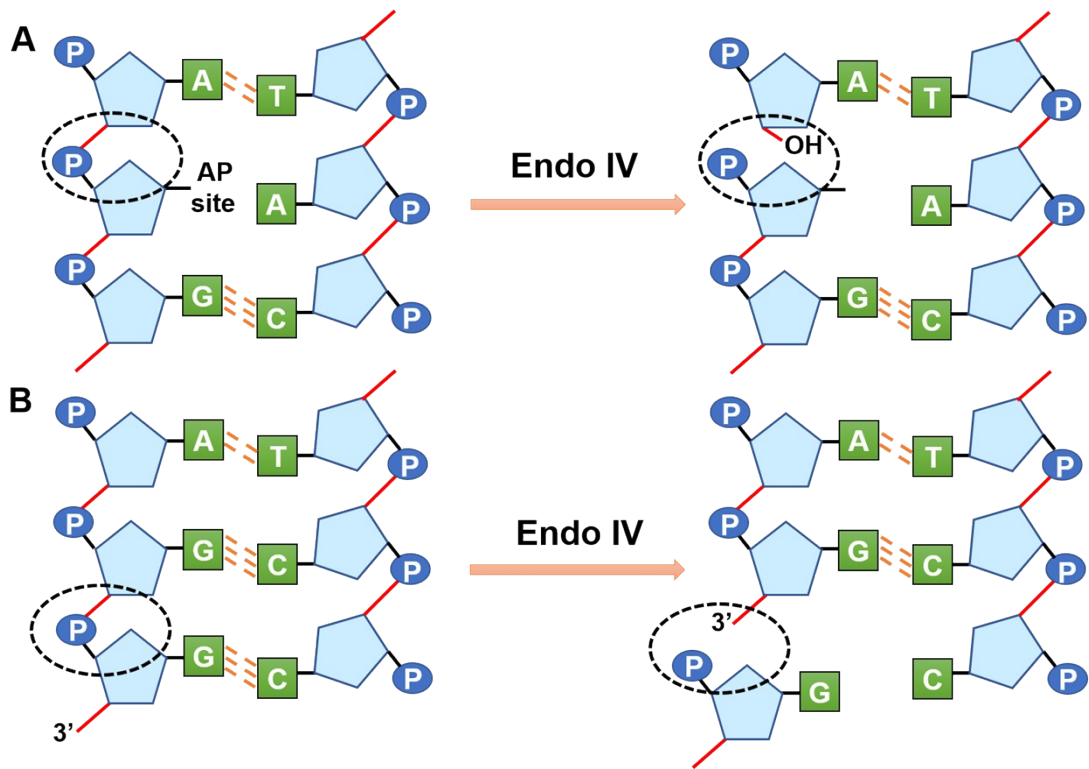

**Fig. S1** Chemical structures of EndoIV substrates, including (A) an AP site cleaved by the AP endonuclease activity (B) a 3'-5' exonuclease activity to blunt 3' terminus of dsDNA.

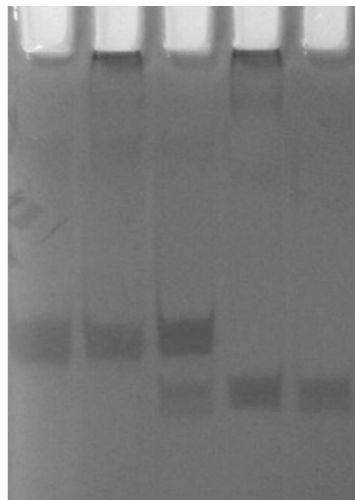

|                | 1 | 2 | 3 | 4 | 5 |
|----------------|---|---|---|---|---|
| <b>P1</b>      | + | + | + | + | - |
| <b>UDG</b>     | - | - | + | + | - |
| <b>Endo IV</b> | - | + | - | + | - |
| <b>P2</b>      | - | - | - | - | + |

**Fig. S2** Denaturing urea PAGE (20%) electrophoresis images of base excising repair enzymes-induced probe P1 cleavage product.

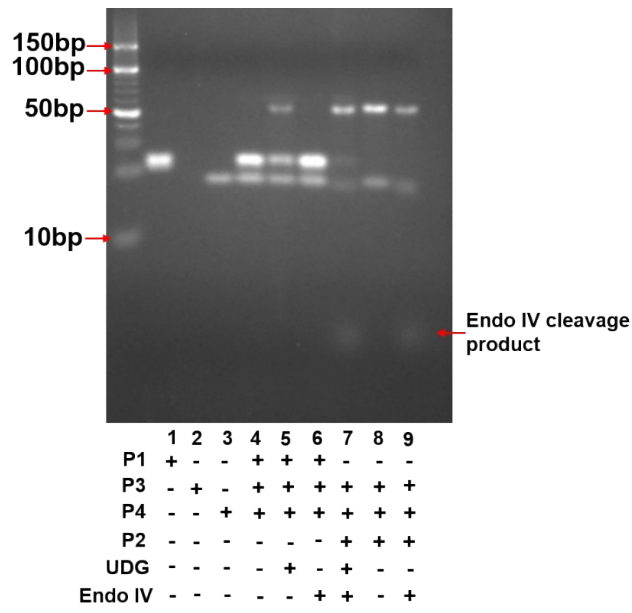

**Fig. S3** Agarose gel (4%) electrophoresis images of the feasibility of the EAECSA strategy for UDG activity assay.

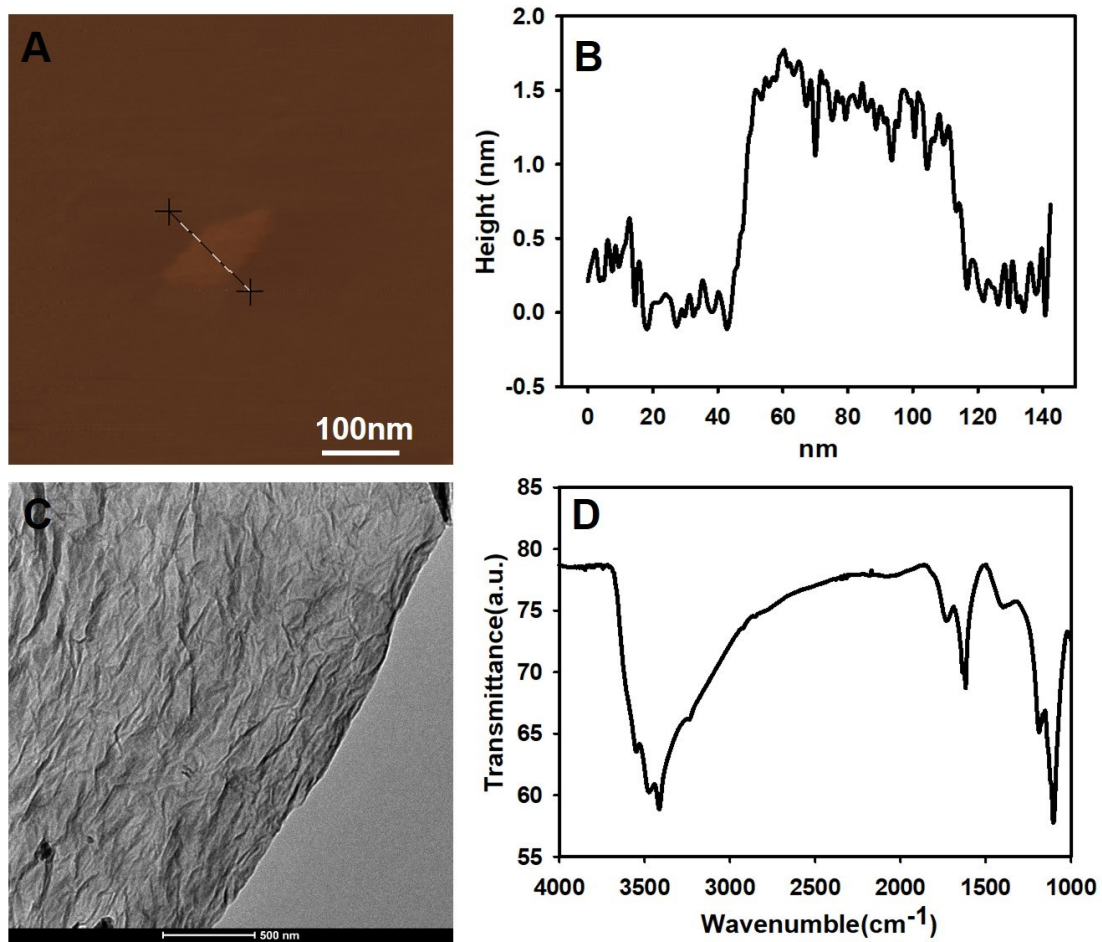

**Fig. S4** Characterization of GO. (A) AFM image (B) Height profiles (C)TEM image (D) FTIR.

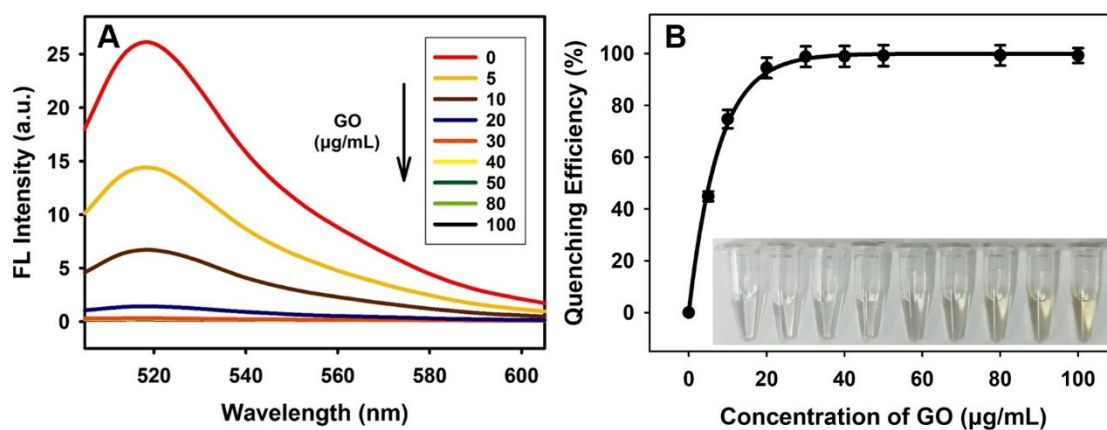

**Fig. S5** (A) Fluorescence spectra of the sensing system after incubation with various concentrations of GO. (B) Plot of fluorescence quenching efficiency versus GO concentration. (Inset: photographs of the sensing aqueous solution with a series of different GO concentrations.



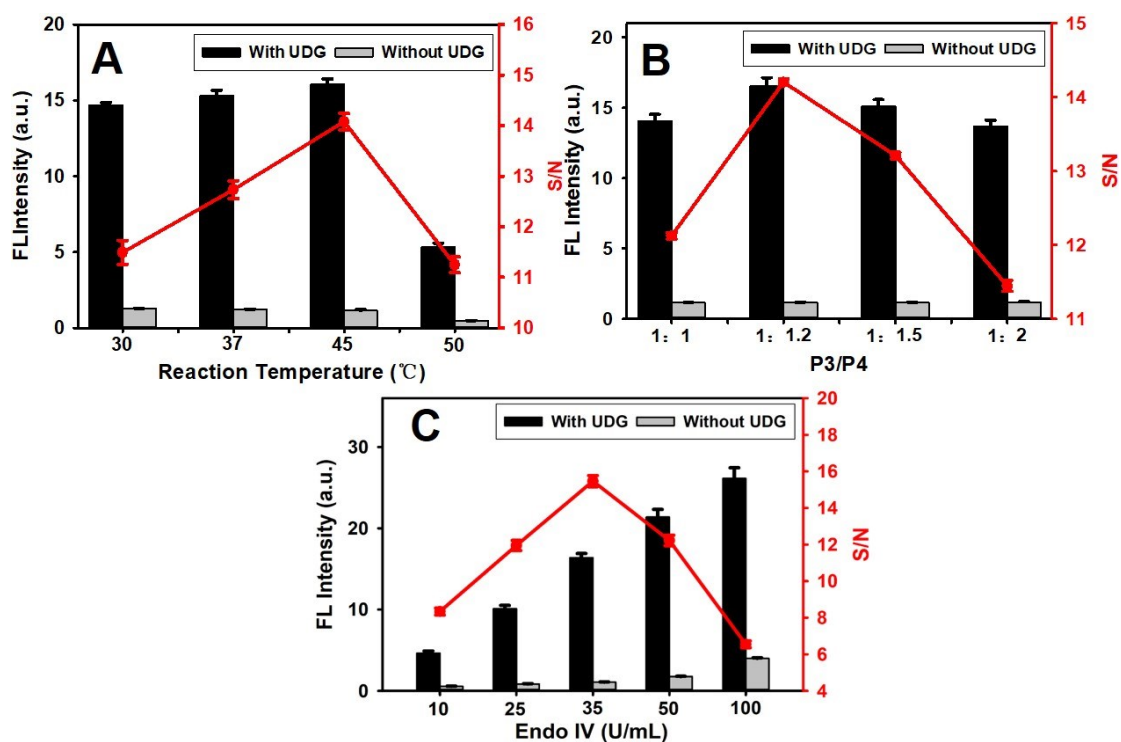

**Fig. S6** Optimization of experimental conditions. Variance of the fluorescence intensity with (A) Endo IV reaction temperature, (B) hybridization ratio of probe P3 and probe P4, (C) the concentration of Endo IV.

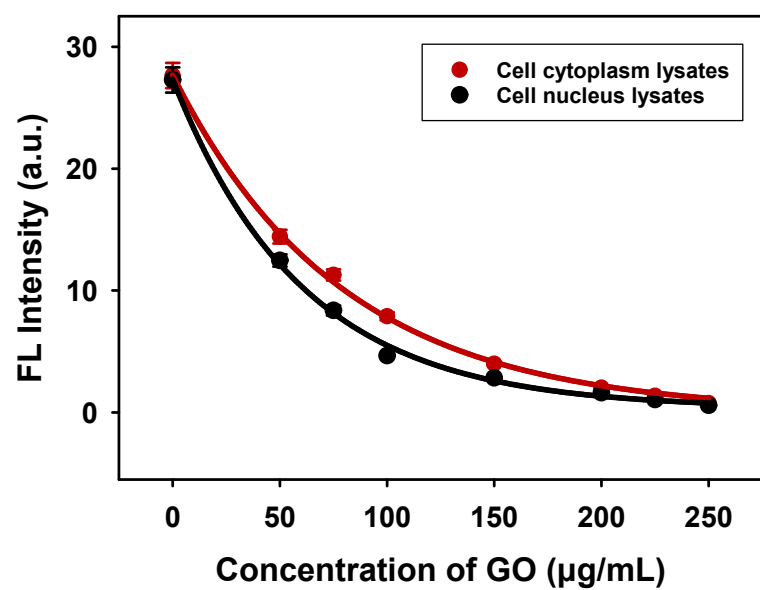

**Fig. S7** Performance about different concentrations of GO HeLa cell cytoplasm lysates (red) and cell nucleus lysates (black).

**Table S2. Comparison of the proposed assay with other previously reported methods.**

| Methods                                                                                                                                               | Detection time | LOD (U mL <sup>-1</sup> ) | Reference |
|-------------------------------------------------------------------------------------------------------------------------------------------------------|----------------|---------------------------|-----------|
| Fluorescence/ Polymerase, nicking enzyme and RNase H-mediated Bicyclic Cascade Signal Amplification strategy                                          | 1 h 50 min     | $1.0 \times 10^{-4}$      | [1]       |
| Fluorescence/ BssHIII and Endo IV mediated exponential amplification strategy                                                                         | > 6 h          | $3.0 \times 10^{-3}$      | [2]       |
| Fluorescence/ Pyridinium luminescent switch-on molecular probe                                                                                        | > 2 h          | $5.0 \times 10^{-3}$      | [3]       |
| colorimetric and smartphone readable method/ G-quadruplex structure with hemin to catalyze H <sub>2</sub> O <sub>2</sub> -mediated oxidation reaction | 1 h 15 min     | $8.0 \times 10^{-3}$      | [4]       |
| Electrochemical/ porphyrin-based covalent-linked nanomaterial assisted signal amplification                                                           | >72 h          | $6.97 \times 10^{-4}$     | [5]       |
| Fluorescence/target induced the removal of uracil in DNA and enhanced the fluorescence fluorophore                                                    | 10 min         | $8.0 \times 10^{-4}$      | [6]       |
| SERS/ Exonuclease I and Endo IV assisted plasmonic coupling reaction                                                                                  | >96 h          | $4.29 \times 10^{-4}$     | [7]       |
| Fluorescence/                                                                                                                                         | >15 h          | $1.5 \times 10^{-4}$      | [8]       |
| Fluorescence/3'-5' exonuclease activity-based Endo IV cyclic signal amplification strategy                                                            | 1 h 25 min     | $7.0 \times 10^{-4}$      | This work |

## References:

- [1] Wang LJ, Ren M, Zhang QY, Tang B, Zhang CY (2017). Excision Repair-Initiated Enzyme-Assisted Bicyclic Cascade Signal Amplification for Ultrasensitive Detection of Uracil-DNA Glycosylase. *Anal. Chem.* 89: 4488-4494. <https://doi.org/10.1021/acs.analchem.6b04673>
- [2] Fan LX, Peng Y, Ning BA, Wei HP, Gao ZX, Bai JL, Guo LQ (2020). A tri-functional probe mediated exponential amplification strategy for highly sensitive detection of Dnmt1 and UDG activities at single-cell level. *Anal. Chim. Acta* 1103:164-173, <https://doi.org/10.1016/j.aca.2019.12.058>
- [3] Lu YJ, Hu DP, Deng Q, Wang ZY, Huang BH, Fang YX, Zhang K, Wong WL (2015). Sensitive and selective detection of uracil-DNA glycosylase activity with a new pyridinium luminescent switch-on molecular probe. *Analyst* 140: 5998-6004. <https://doi.org/10.1039/C5AN01158B>
- [4] Nie HJ, Wang W, Li W, Nie Z, Yao SZ (2015). A colorimetric and smartphone readable method for uracil-DNA glycosylase detection based on the target-triggered formation of G-quadruplex. *Analyst*, 140: 2771-2777. <https://doi.org/10.1039/C4AN02339K>
- [5] Liu TT, Cui L, Li DK, Wu LL, Zhang XM (2020). An enzyme-free and substrate-free electrochemical biosensor with robust porphyrin-based covalent-linked nanomaterial as nanoelectrocatalyst and efficient support for sensitive detection of uracil-DNA glycosylase. *Biosens. Bioelectron.* 154: 112014-<https://doi.org/10.1016/j.bios.2020.112014>
- [6] Tao J, Song PS, Sato Y, Nishizawa S., Teramae N, Tong AJ, Xiang Y (2015). A label-free and sensitive fluorescent method for the detection of uracil-DNA glycosylase activity. *Chem. Commun.* 51: 929-932. <https://doi.org/10.1039/C5AN01158B>
- [7] Wang HW, Cui YF, Wang JF, Liu S, Zhang X, Song XL, Wang Y, Huang J D, Yu JH (2019) A facile and robust SERS platform for highly sensitive and reproducible detection of uracil-DNA glycosylase using target-activated plasmonic coupling. *Sens. Actuators, B* 287: 535-543. <https://doi.org/10.1016/j.snb.2019.02.054>

[8] Du YC, Cui YX, Li XY, Sun GY, Zhang YP, Tang AN, Kim K, Kong DM (2018). Terminal Deoxynucleotidyl Transferase and T7 Exonuclease-Aided Amplification Strategy for Ultrasensitive Detection of Uracil-DNA Glycosylase. *Anal. Chem.* 90: 8629-8634. <https://doi.org/10.1021/acs.analchem.8b01928>
